# Supplementary material
Source: PubMed Central journal article supplement (PMC9081198)

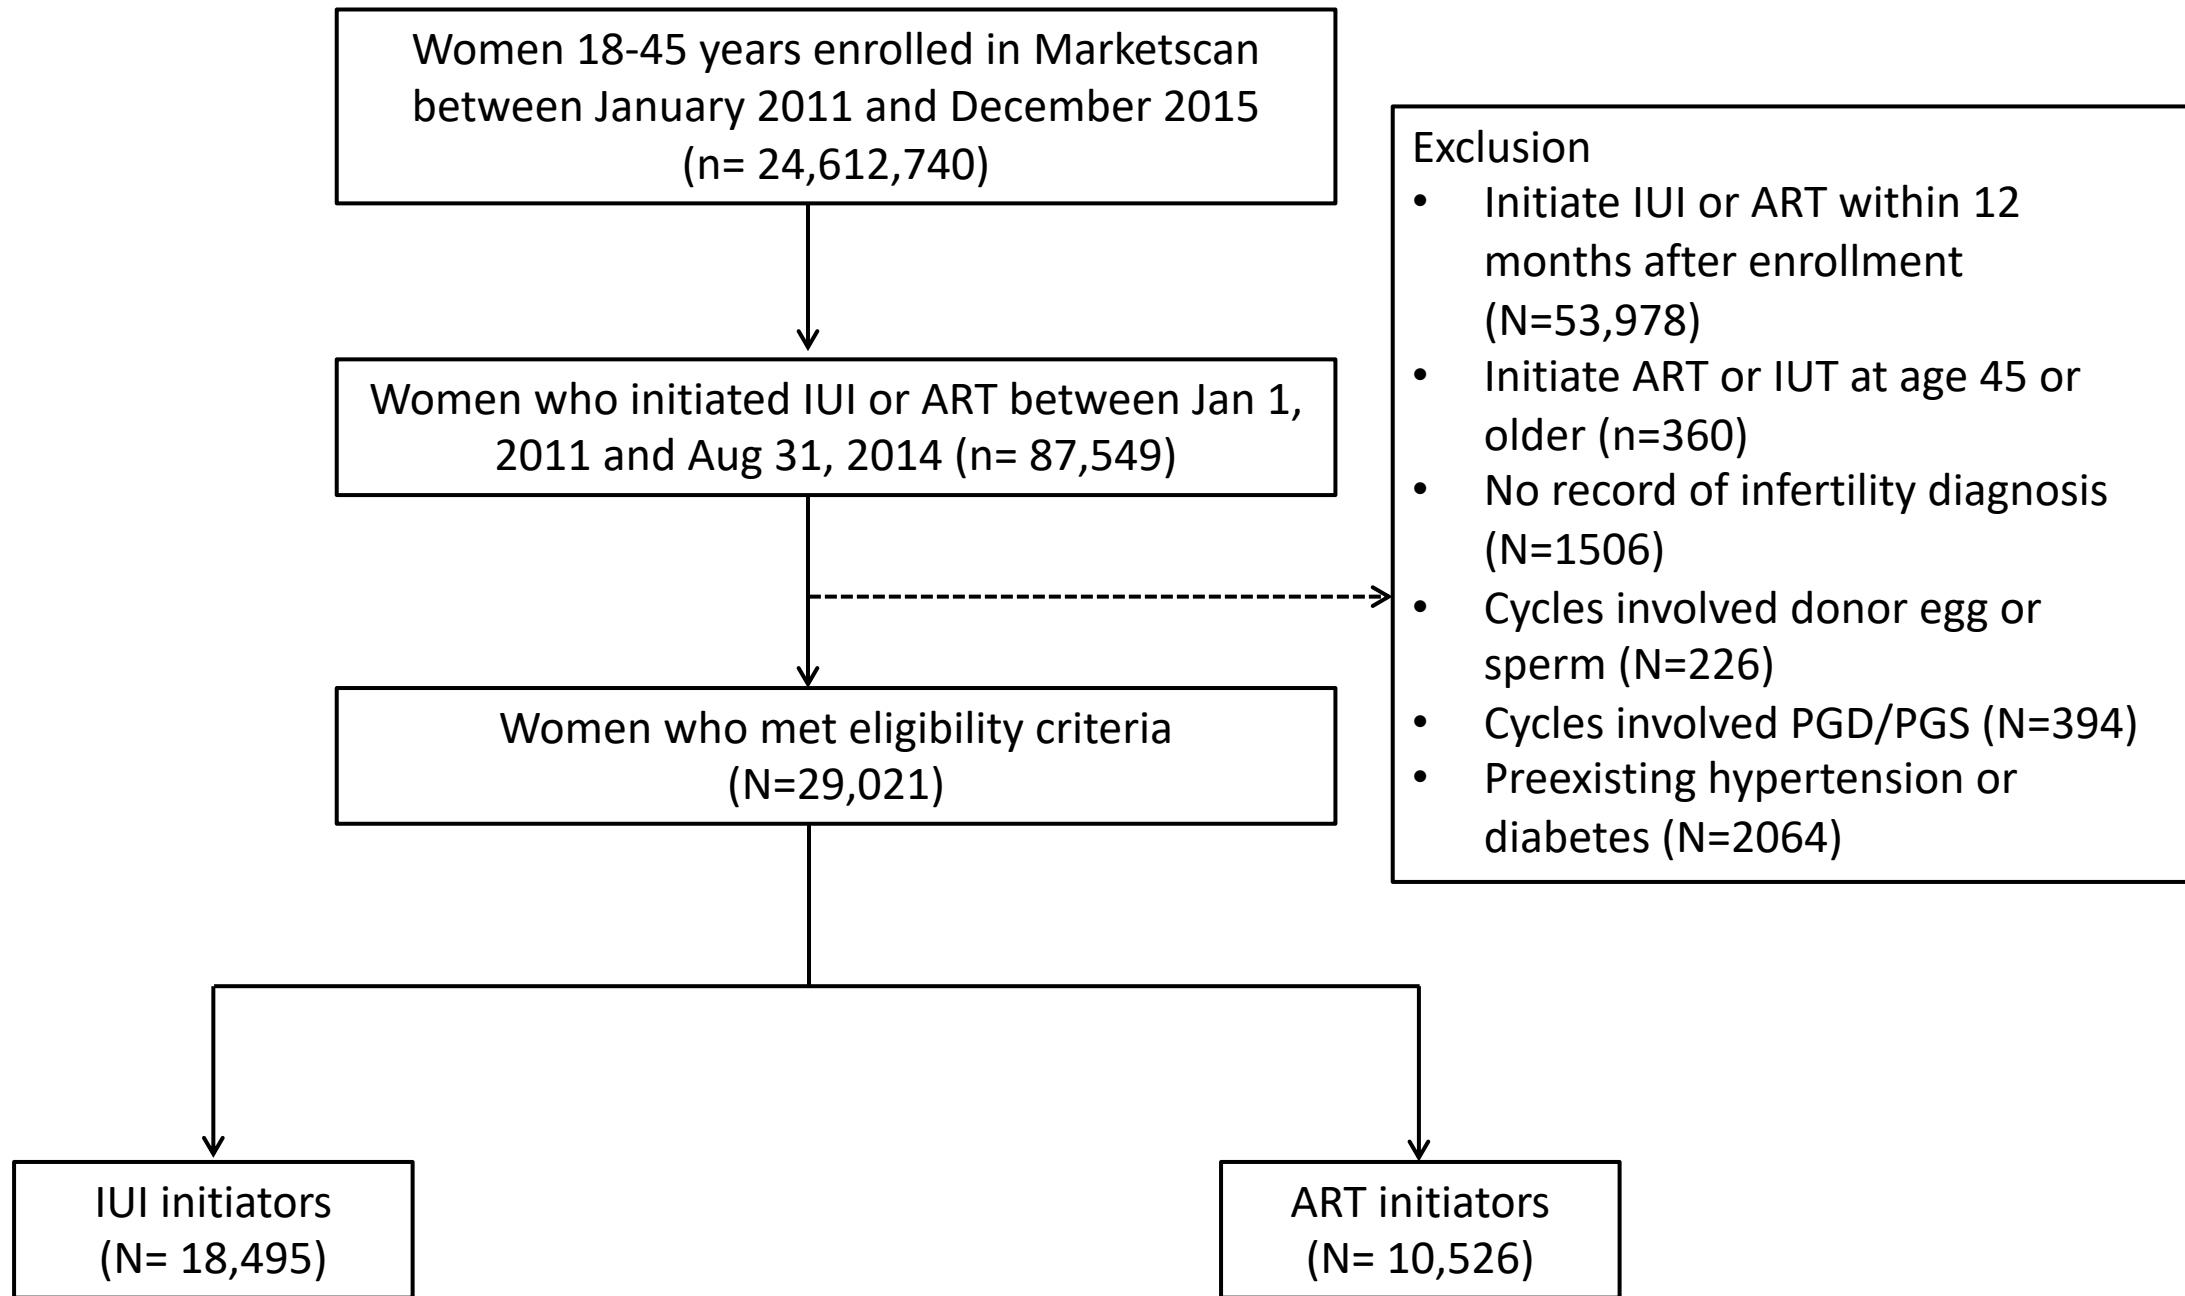

Supplement: NIHMS1778169-supplement-3.pdf [file NIHMS1778169-supplement-3.pdf]

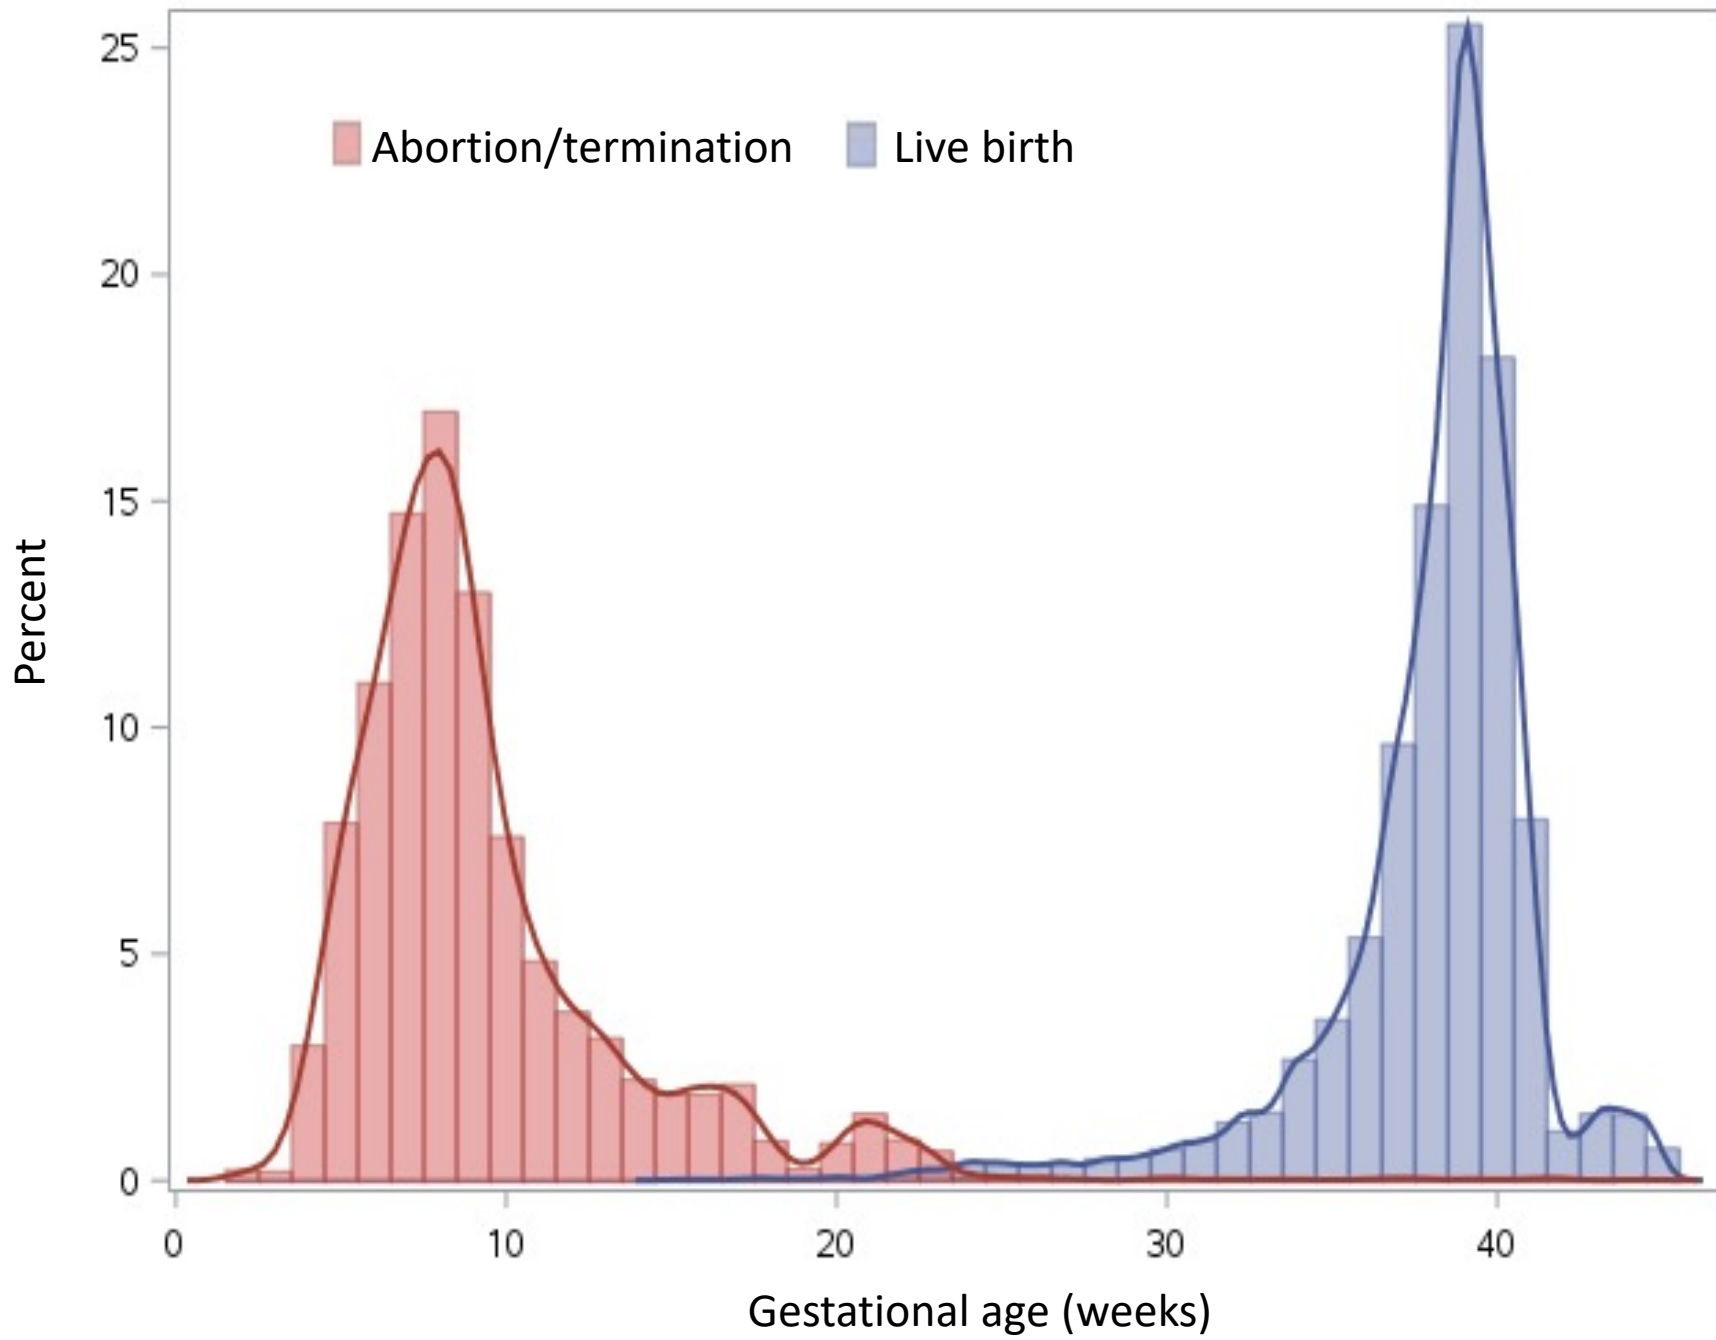

Supplement: NIHMS1778169-supplement-4.pdf [file NIHMS1778169-supplement-4.pdf]
